# Supplementary material
Source: publisher figshare collection journal article supplement (https://acs.figshare.com/ndownloader/files/4463476)
Supplement: Supplementary file 1 [file 4463476]

## Supporting Information

Cyanide-Bridged Fe(III)-Mn(III) Bimetallic Systems Assembled from the  
fac-Fe Tricyanide and Mn Schiff bases: Structures, Magnetic Properties,  
and DFT Calculations

Hyun Young Kwak,<sup>†</sup> Dae Won Ryu,<sup>†</sup> Jin Wuk Lee,<sup>†</sup> Jung Hee Yoon,<sup>†</sup> Hyoung Chan  
Kim,<sup>‡</sup> Eui Kwan Koh,<sup>§</sup> Jamin Krinsky,<sup>||</sup> and Chang Seop Hong<sup>\*,†</sup>

Department of Chemistry (BK21), Korea University, Seoul 136-713, Korea, National  
Fusion Research Institute, Daejeon 305-333, Nano-Bio System Research Team, Korea  
Basic Science Institute, Seoul 136-713, Korea, and Department of Chemistry,  
University of California, Berkeley, California 94720-1460

Table S1. Computed data of DFT calculations for **3**.

|                       |    | HS             | BS             |
|-----------------------|----|----------------|----------------|
| Spin density          | Fe | 1.04835        | -1.03864       |
|                       | Mn | 3.84395        | 3.84461        |
| $\langle S^2 \rangle$ |    | 8.8026         | 4.8019         |
| E(a.u.)               |    | -4774.57712542 | -4774.57705180 |

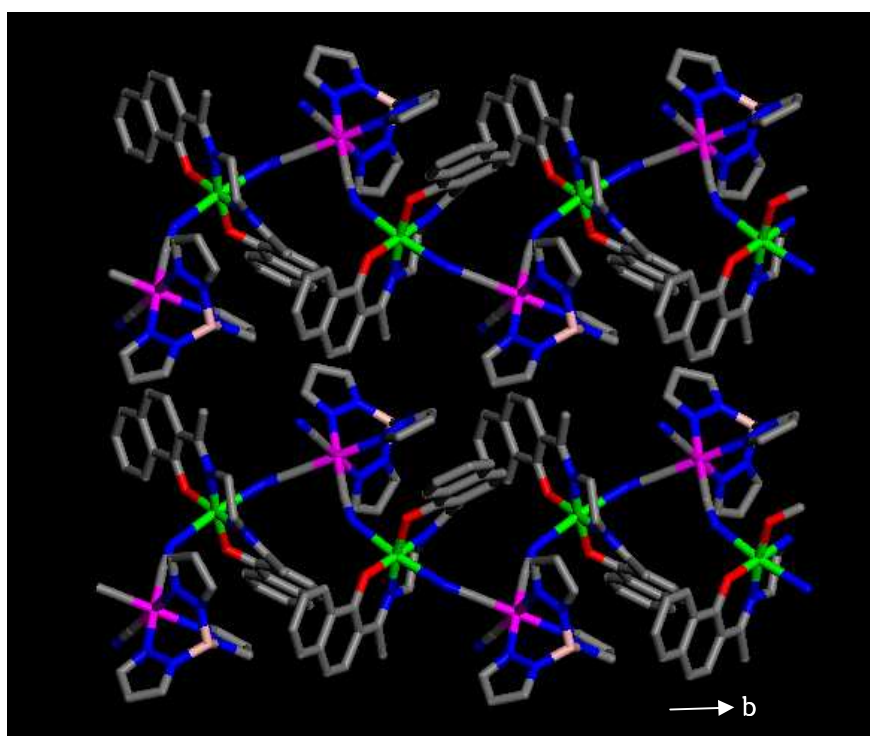

**Figure S1.** 1D structure of **5** displaying zigzag patterns along the *b*-axis

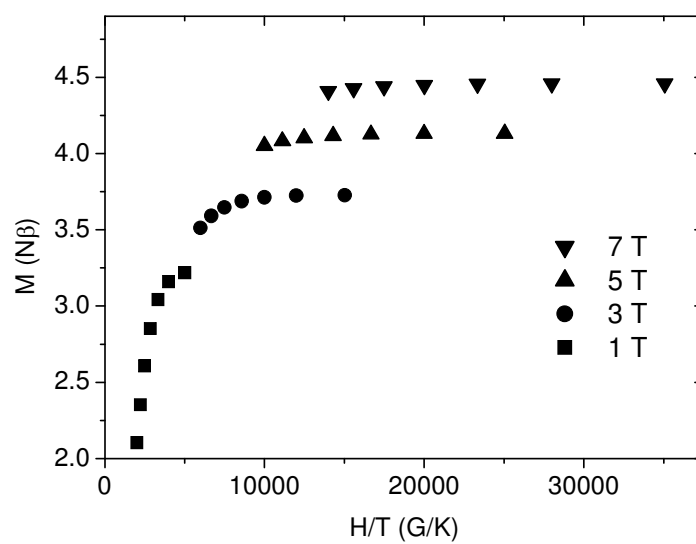

**Figure S2.** Plots of reduce magnetization versus  $H/T$  for **5**.

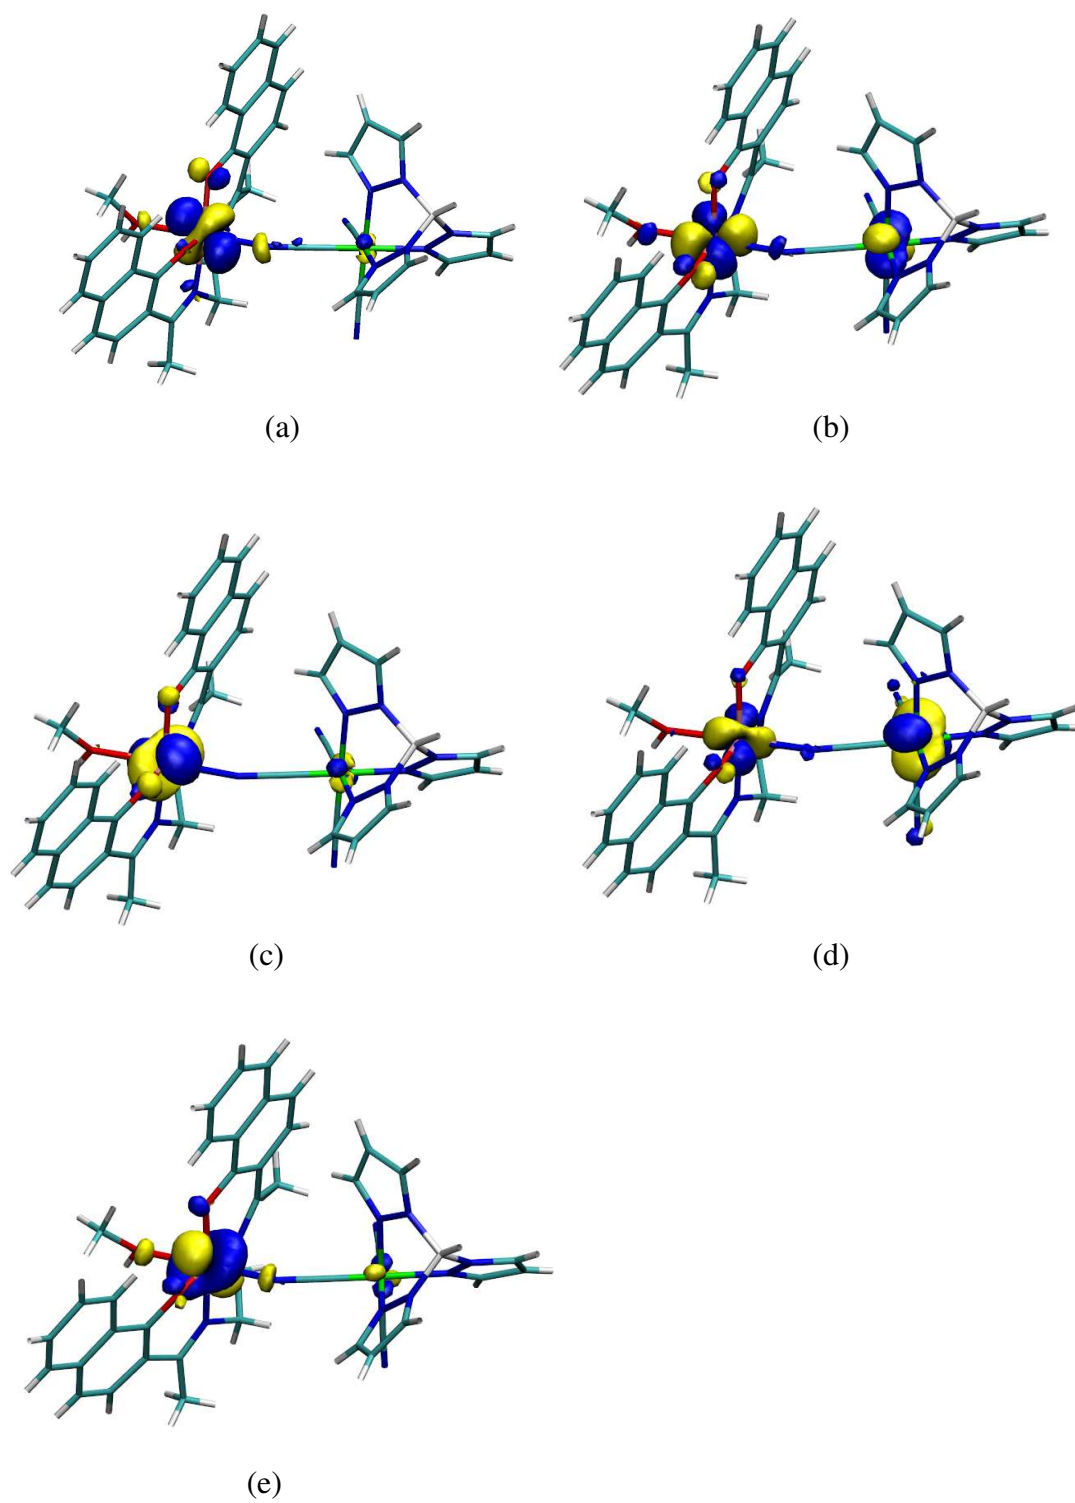

**Figure S3.** Magnetic natural orbitals for the high-spin configuration of **3**.
